# Supplementary material for: Whole-Exome Sequencing Reveals the Genomic Features of the Micropapillary Component in Ground-Glass Opacities
Source: MDPI journal article supplement (doi:10.3390/cancers14174165), 2022-08-27
Supplement: s1 [file s1]

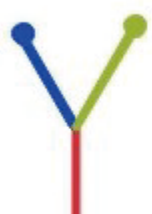

SAMPLE\_6

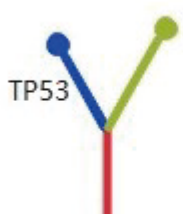

SAMPLE\_7

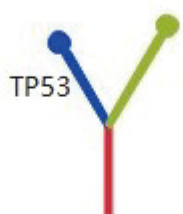

SAMPLE\_10

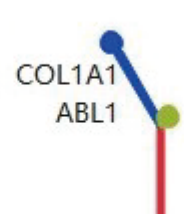

SAMPLE\_12

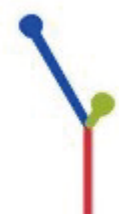

SAMPLE\_14

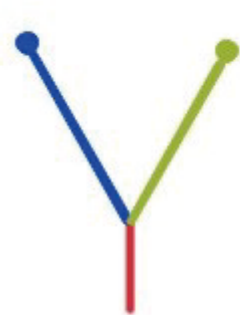

SAMPLE\_3

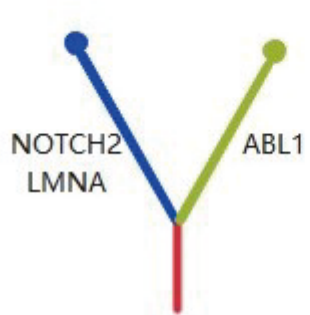

SAMPLE\_4

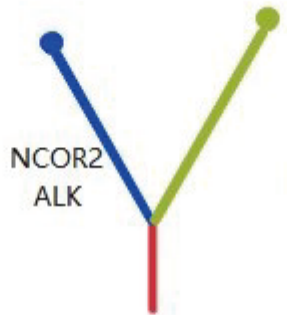

SAMPLE\_16

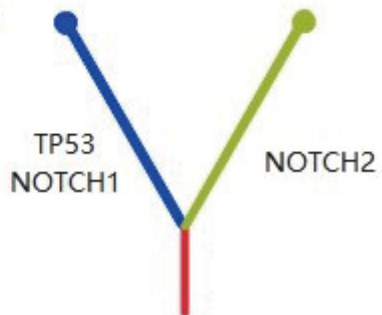

SAMPLE\_17

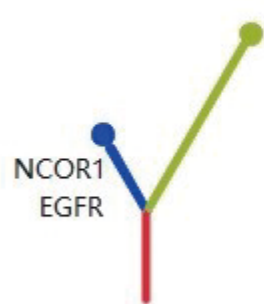

SAMPLE\_1

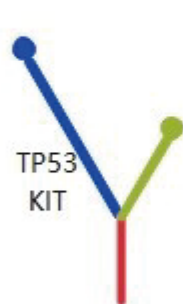

SAMPLE\_2

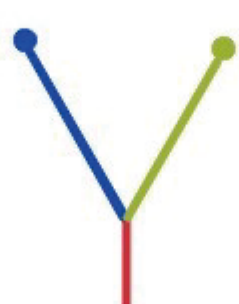

SAMPLE\_11

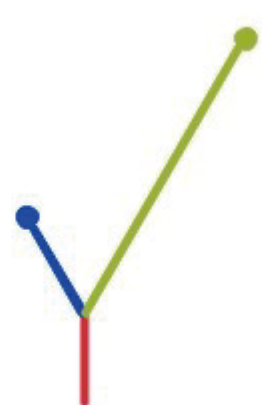

SAMPLE\_21

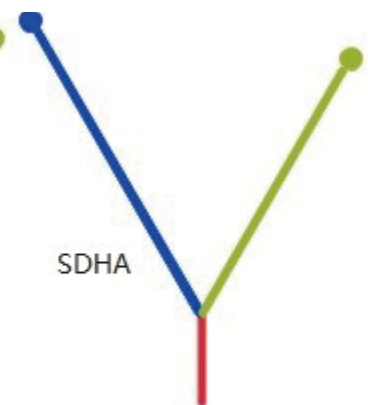

SAMPLE\_23
