# Supplementary figures and images for: Whole-Exome Sequencing Reveals the Genomic Features of the Micropapillary Component in Ground-Glass Opacities
Source: MDPI journal article supplement (doi:10.3390/cancers14174165), 2022-08-27

**A**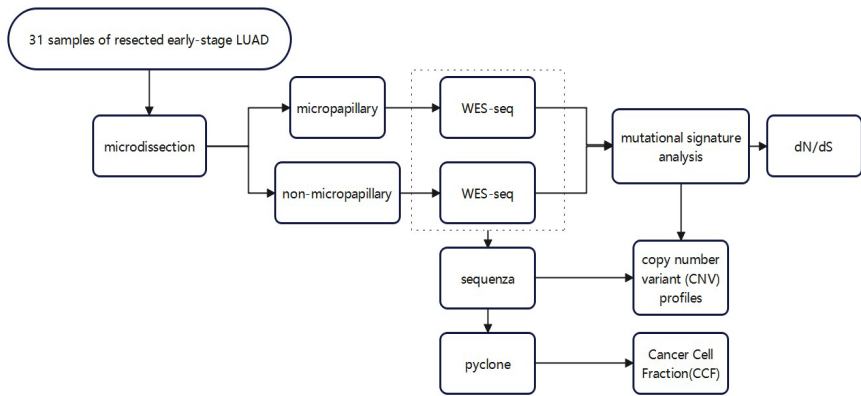**B**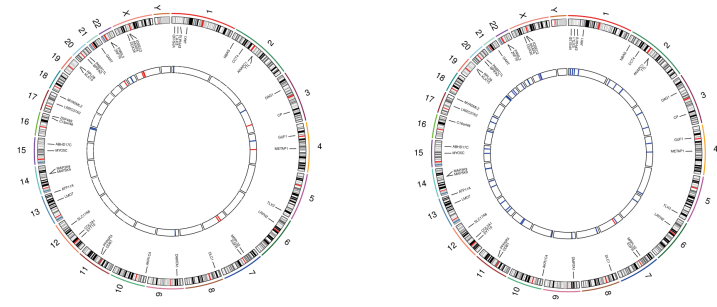**C**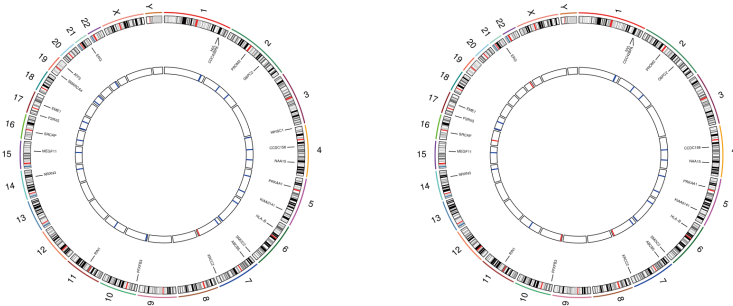**D**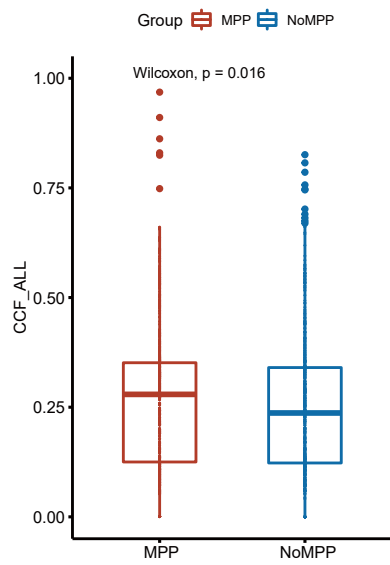**E**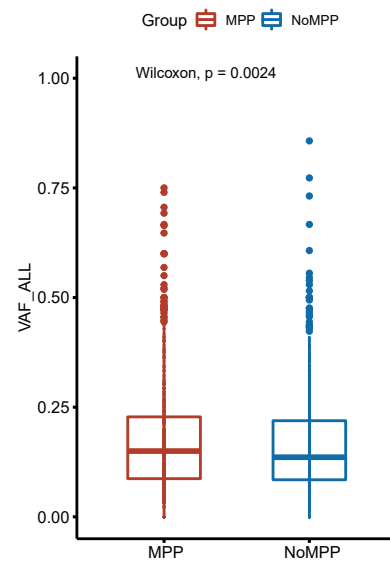**F**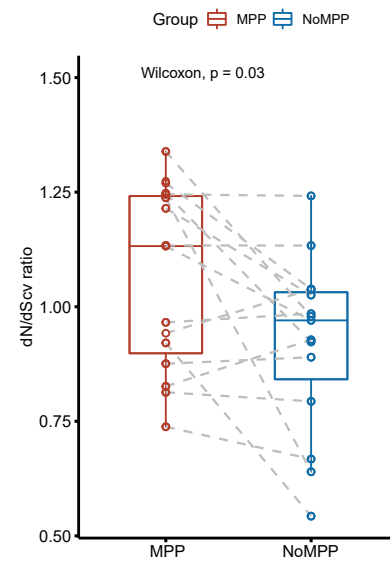

Supplement: s1 [file s1]
